# Supplementary material
Source: PubMed Central journal article supplement (PMC2493479)
Supplement: 00062.2008_1.pdf [file 00062.2008_1.pdf]

## SUPPLEMENTAL MATERIAL LEGENDS

**Supplemental Material S1: PCR analysis for expression of EGFP mRNA in Opn4-EGFP mouse spleen, liver, lung, cerebellum, brain cortex and retina.** Product of the expected size (255-bp) for EGFP was obtained only from retinal RNA. Beta-actin, in contrast, was detected in all tissues probed.

**Supplemental Material S2: RT-PCR method.**

**Supplemental Material S3: Bursts of depolarization during the first postnatal week in ipRGCs of Opn4-EGFP mice.** Spontaneous bursts of depolarization were detected in ipRGCs at early postnatal stages (P0-7) in the absence of light stimulation. Examples are shown at P2 (left column) and P6 (right column).
